# Supplementary material for: Unveiling the Deep Ocean warming: observed bottom ocean dataset across Mediterranean Sea
Source: Copernicus journal article supplement (doi:10.5194/essd-2025-739), 2025-12-29

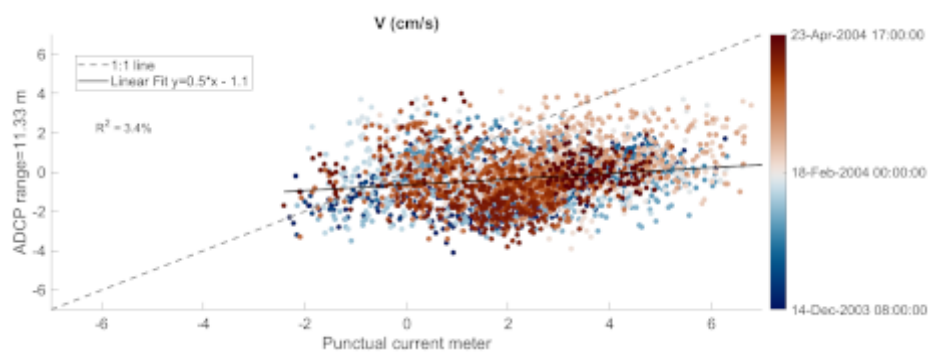

Supplement: Supplementary file [file essd-2025-739-AC2-supplement.pdf]
